# Supplementary material
Source: PubMed Central journal article supplement (PMC4918425)
Supplement: PRO-25-1260-s001.pdf [file PRO-25-1260-s001.pdf]

*Supplementary Material*

*for*

**HOW MUTATIONAL EPISTASIS IMPAIRS PREDICTABILITY IN PROTEIN EVOLUTION AND DESIGN**

Charlotte M. Miton<sup>1</sup> and Nobuhiko Tokuriki<sup>1,\*</sup>.

## Table of Contents

### A. Supplementary figures

**Figure S1:** Nine evolutionary trajectories toward new function.

**Figure S2:** Round-per-round epistatic constraints in evolutionary trajectories.

**Figure S3:** Localization of epistatic mutations on the protein crystal structures.

**Figure S4:** Evolution of mutational distribution, round-per-round.

**Figure S5:** Further examples of direct and indirect interactions causing epistasis.

### B. Supplementary tables

**Table S1:** Summary of the mutational effects and distances for each evolutionary trajectory.

**Table S2:** Summary of round-per-round improvements for each evolutionary trajectory.

## A. Supplementary figures

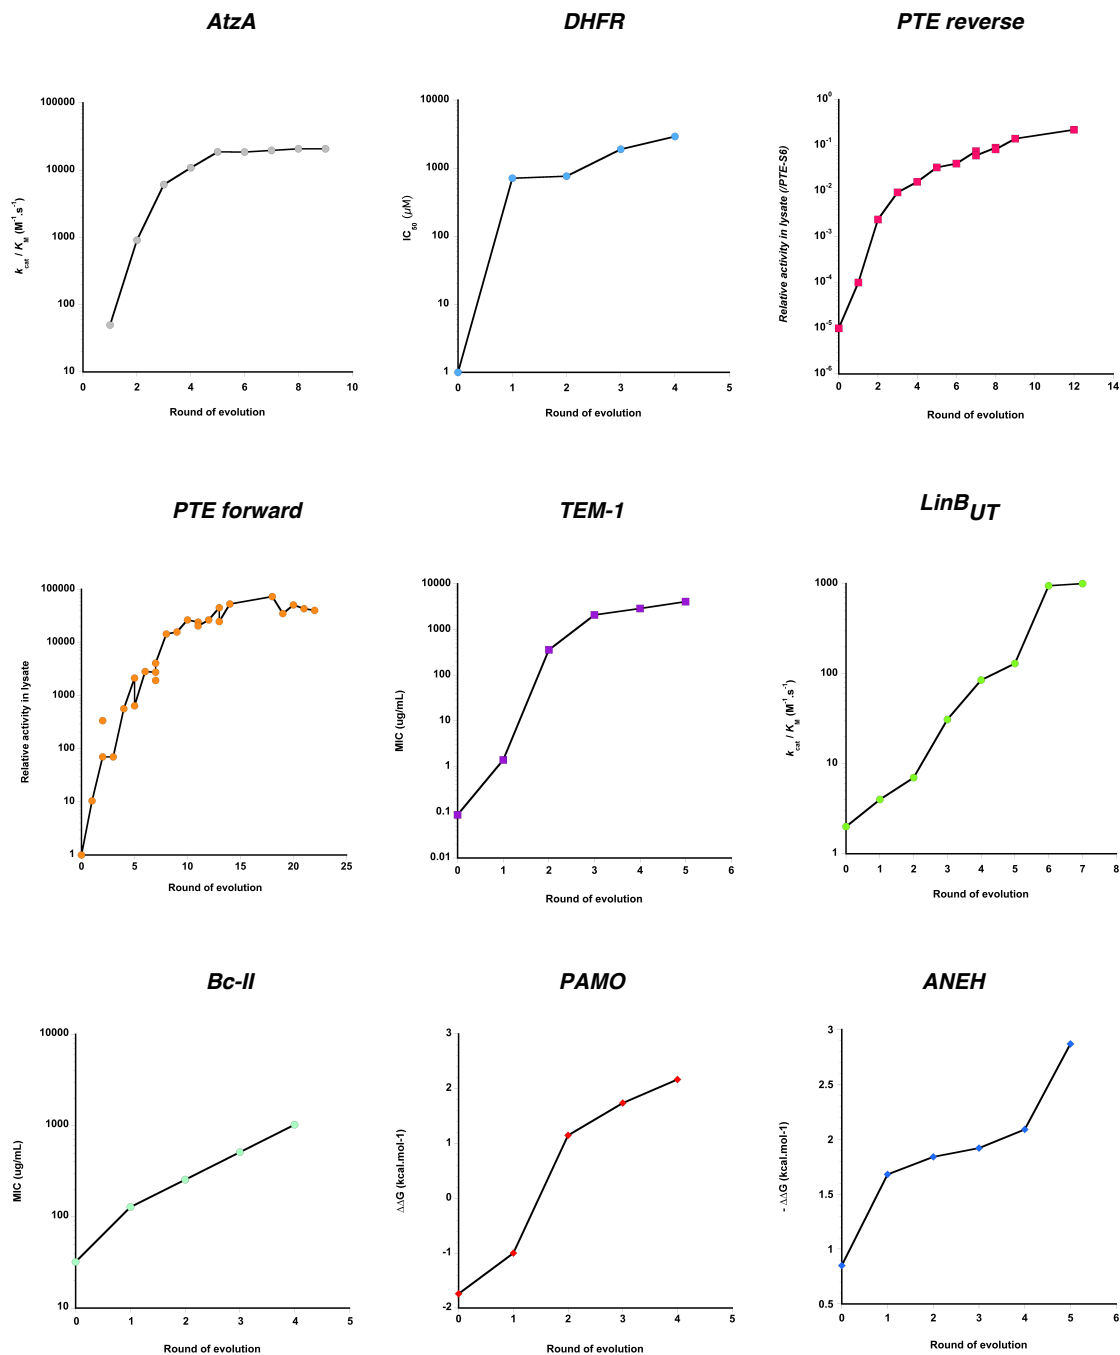

**Figure S1.** Nine evolutionary trajectories toward new function. Five trajectories are constrained by diminishing returns, *i.e.* the first steps yield large improvements that vanished toward the end of the evolution: AtzA, DHFR, PTE-rev, PTE-for and TEM-1. By contrast, LinB<sub>UT</sub>, Bc-II, PAMO and ANEH display more linear trajectories, suggesting that some evolutionary potential may still exist.

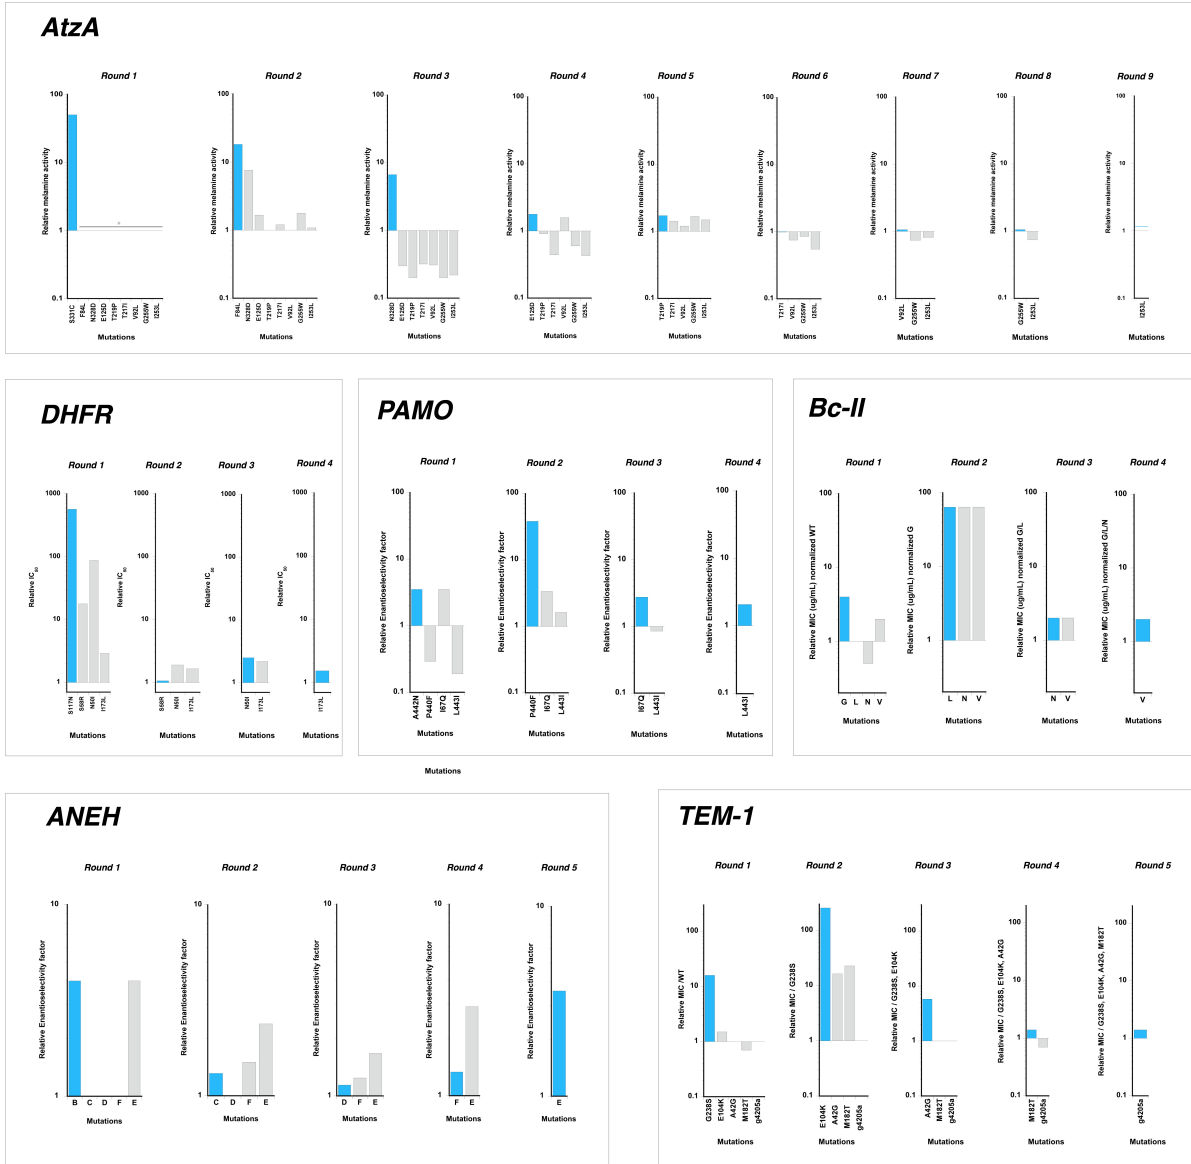

**Figure S2.** Round-per-round epistatic constraints in evolutionary trajectories. Fold change in activity for all possible mutational combinations in the evolutionary trajectories of AtzA, DHFR, PAMO, Bc-II, ANEH and TEM-1. Mutations fixed at the next round are shown as a blue bar. All possible combinations, not selected but still available at a given round, are shown as grey bars. Non-detectable activity/binding levels are shown as stars.

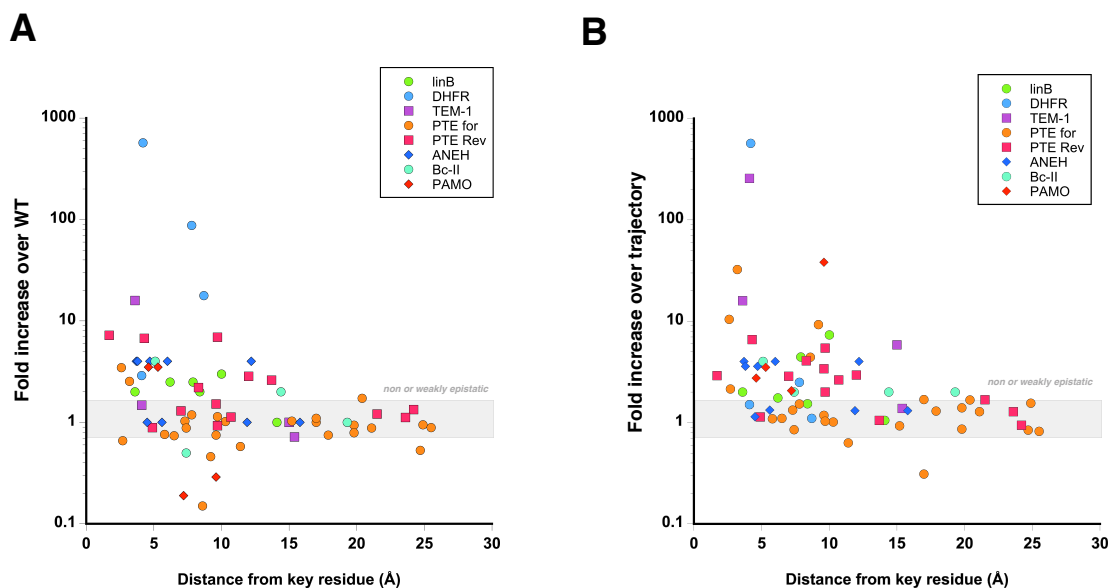

**Figure S3.** Localization of epistatic mutations on the protein crystal structures. Mutational effect *versus* distance between each mutation and a key active site residue on (A) the wild-type background, and (B) as it occurs in the trajectory. Distances are measured in angstroms (Å). The grey rectangle defines mutations for which the epistasis effects falls between 0.7 and 1.5-fold change, *i.e.* non-functional or non-epistatic mutations.

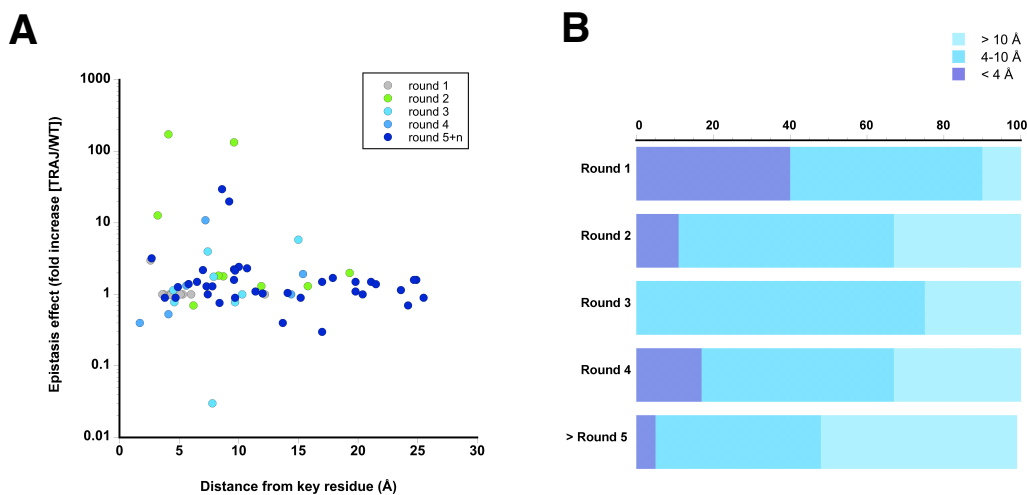

**Figure S4.** Evolution of mutational distribution, round-per-round. (A) Epistasis effect of each mutation *versus* distance from a key catalytic residue colored by round of appearance in the evolutionary trajectory (from round 1, to 5 and more, grey to dark blue). (B) Percentage of mutations localized within less than 4 Å (dark blue), between 4-10 Å (marine blue) and over 10 Å (light blue) at each round of evolution for 59 mutations across nine trajectories.

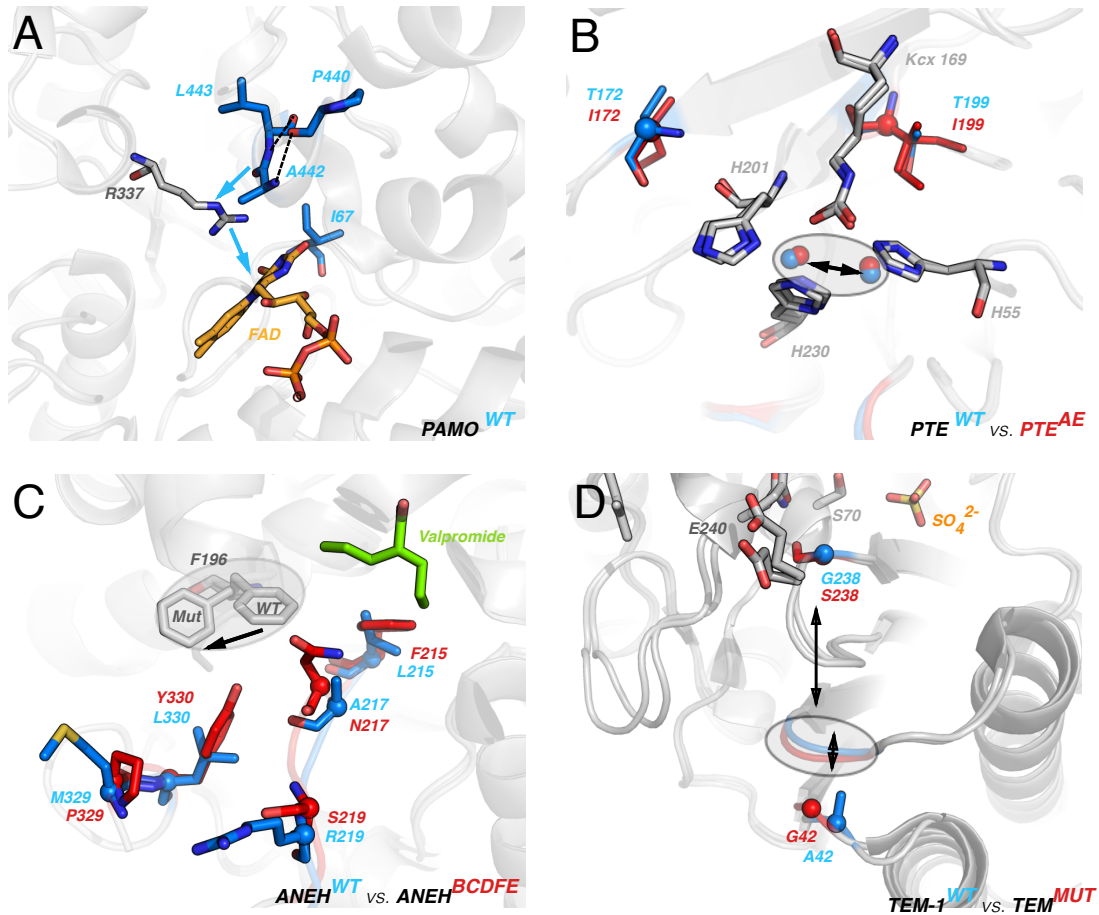

**Figure S5.** Further examples of direct and indirect interactions causing epistasis. (A) In PAMO<sup>WT</sup>, the proximity of mutations P440F, A442N and L443I suggest that they interact (blue arrows) with each other (through hydrogen bonding interactions, dotted black lines). Yet these mutations may not directly interact with the substrate or the FAD cofactor (orange sticks), rather they appear to contribute to a functional change *via* repositioning of R337<sup>1</sup>. (B) Similar to Bc-II evolution, PTE<sup>AE</sup> (evolved mutant) exhibits a shift in distance between two metal ions that seems to result from an epistatic change in dynamics, acted upon by T199I and T172I. (C) Indirect interactions may cause epistasis between clusters B and C in ANEH, *via* a shift of active site residues such as F196 (grey sticks) between ANEH<sup>WT</sup> and ANEH<sup>BCDFE</sup>. (D) Long-range effects in TEM-1 between mutations A42G and G238S may propagate through a change in loop 266-271 conformation.

## B. Supplementary tables

**Table S1.** Summary of the mutational effects and distances for each evolutionary trajectory.

| <b>AtzA</b>                                                                                                                                       |                            |                                                     |                                      |                                                  |               |                                                      |
|---------------------------------------------------------------------------------------------------------------------------------------------------|----------------------------|-----------------------------------------------------|--------------------------------------|--------------------------------------------------|---------------|------------------------------------------------------|
| Round of appearance                                                                                                                               | Mutation                   | $k_{cat}/K_M$ ( $M^{-1}\cdot s^{-1}$ ) <sup>a</sup> | WT                                   | TRAJECTORY                                       |               | Distance between mut AA and key residue <sup>b</sup> |
|                                                                                                                                                   |                            |                                                     | Fold increase over WT <sup>a,b</sup> | Fold increase over previous round <sup>a,b</sup> | Ratio Traj/WT |                                                      |
| <i>AtzA</i> <sup>WT</sup>                                                                                                                         |                            | <i>n.d.</i>                                         | 1.00                                 | 1.00                                             |               | -                                                    |
| 1                                                                                                                                                 | <b>S331C</b>               | 50                                                  | > 50                                 | > 50                                             |               | 4.2                                                  |
| 2                                                                                                                                                 | <b>F84L</b>                | 910                                                 | <i>n.d.</i>                          | 18.2                                             | 1.00          | 8.7                                                  |
| 3                                                                                                                                                 | <b>N328D</b>               | 6100                                                | <i>n.d.</i>                          | 6.7                                              | 0.06          | 7.8                                                  |
| 4                                                                                                                                                 | <b>E125D</b>               | 10898                                               | <i>n.d.</i>                          | 1.8                                              | 0.03          | 7.8                                                  |
| 5                                                                                                                                                 | <b>T219P</b>               | 18701                                               | <i>n.d.</i>                          | 1.7                                              | 0.53          | 4.1                                                  |
| 6                                                                                                                                                 | <b>T217I</b>               | 18604                                               | <i>n.d.</i>                          | 1.0                                              |               |                                                      |
| 7                                                                                                                                                 | <b>V92L</b>                | 19700                                               | <i>n.d.</i>                          | 1.1                                              |               |                                                      |
| 8                                                                                                                                                 | <b>G255W</b>               | 20760                                               | <i>n.d.</i>                          | 1.1                                              |               |                                                      |
| <i>TriA</i> <sup>WT</sup>                                                                                                                         | <b>I253L</b>               | 20810                                               | <i>n.d.</i>                          | 1.0                                              |               |                                                      |
| Additive model (null)                                                                                                                             |                            |                                                     | > 50                                 |                                                  |               |                                                      |
| Obs. fold change                                                                                                                                  | final mut (TriA)/WT (AtzA) | > 20810                                             |                                      |                                                  |               |                                                      |
| <sup>a</sup> The hydrolysis of melamine is not detectable in <i>AtzA</i> <sup>WT</sup> nor in any variants besides <i>AtzA</i> <sup>S331C</sup> . |                            |                                                     |                                      |                                                  |               |                                                      |
| <sup>b</sup> The fitness is the Michaelis parameter $k_{cat}/K_M$ ( $M^{-1}\cdot s^{-1}$ ).                                                       |                            |                                                     |                                      |                                                  |               |                                                      |

  

| <b><i>P. vivax</i> DHFR</b>                                                                                  |              |                                           |                                      |                                                |               |                                                      |
|--------------------------------------------------------------------------------------------------------------|--------------|-------------------------------------------|--------------------------------------|------------------------------------------------|---------------|------------------------------------------------------|
| Round of appearance                                                                                          | Mutation     | IC <sub>50</sub> ( $\mu M$ ) <sup>a</sup> | WT                                   | TRAJECTORY                                     |               | Distance between mut AA and key residue <sup>b</sup> |
|                                                                                                              |              |                                           | Fold increase over WT <sup>a,b</sup> | Fold increase over previous round <sup>a</sup> | Ratio Traj/WT |                                                      |
| <i>DHFR</i> <sup>WT</sup>                                                                                    |              | 1.2                                       | 1.00                                 | 1.00                                           | 1.00          | -                                                    |
| 1                                                                                                            | <b>S117N</b> | 712                                       | 570.5                                | 570.5                                          | 1.00          | 4.2                                                  |
| 2                                                                                                            | <b>S58R</b>  | 761                                       | 17.8                                 | 1.1                                            | 0.06          | 8.7                                                  |
| 3                                                                                                            | <b>N50I</b>  | 1899                                      | 87.4                                 | 2.5                                            | 0.03          | 7.8                                                  |
| 4                                                                                                            | <b>I173L</b> | 2926                                      | 2.9                                  | 1.5                                            | 0.53          | 4.1                                                  |
| Additive model (null)                                                                                        |              |                                           | 2572294                              |                                                |               |                                                      |
| Obs. fold change                                                                                             | final mut/WT | 2343                                      |                                      |                                                |               |                                                      |
| <sup>a</sup> IC <sub>50</sub> measured in <i>S. cerevisiae</i> .                                             |              |                                           |                                      |                                                |               |                                                      |
| <sup>b</sup> Distance between mutated residues and the pyrimethamine ligand on the WT structure (pdb: 2bl9). |              |                                           |                                      |                                                |               |                                                      |

  

| <b><i>S. japonicum</i> UT26 Lin<sub>BUT</sub></b>                                                                                         |              |                                                     |                                      |                                                |               |                                                      |
|-------------------------------------------------------------------------------------------------------------------------------------------|--------------|-----------------------------------------------------|--------------------------------------|------------------------------------------------|---------------|------------------------------------------------------|
| Round of appearance                                                                                                                       | Mutation     | $k_{cat}/K_M$ ( $M^{-1}\cdot s^{-1}$ ) <sup>a</sup> | WT                                   | TRAJECTORY                                     |               | Distance between mut AA and key residue <sup>b</sup> |
|                                                                                                                                           |              |                                                     | Fold increase over WT <sup>a,b</sup> | Fold increase over previous round <sup>a</sup> | Ratio Traj/WT |                                                      |
| <i>Lin</i> <sub>BUT</sub> <sup>WT</sup>                                                                                                   |              | 2                                                   | 1.00                                 | 1.00                                           | 1.00          | -                                                    |
| 1                                                                                                                                         | <b>A247H</b> | 4                                                   | 2                                    | 2.00                                           | 1.00          | 3.6                                                  |
| 2                                                                                                                                         | <b>I134V</b> | 7                                                   | 2.5                                  | 1.75                                           | 0.70          | 6.2                                                  |
| 3                                                                                                                                         | <b>I138L</b> | 31                                                  | 2.5                                  | 4.43                                           | 1.77          | 7.9                                                  |
| 4                                                                                                                                         | <b>A112V</b> | 85                                                  | <i>n.d.</i>                          | 2.74                                           | -             | 10.5                                                 |
| 5                                                                                                                                         | <b>M253I</b> | 130                                                 | 2                                    | 1.53                                           | 0.76          | 8.4                                                  |
| 6                                                                                                                                         | <b>A135T</b> | 950                                                 | 3                                    | 7.31                                           | 2.44          | 10                                                   |
| <i>Lin</i> <sub>BM</sub> <sup>WT</sup>                                                                                                    | <b>A81T</b>  | 1000                                                | 1                                    | 1.05                                           | 1.05          | 14.1                                                 |
| Additive model (null)                                                                                                                     |              |                                                     | 75                                   |                                                |               |                                                      |
| Obs. fold change                                                                                                                          | final mut/WT | 500                                                 |                                      |                                                |               |                                                      |
| <sup>a</sup> The fitness is the Michaelis parameter $k_{cat}/K_M$ ( $M^{-1}\cdot s^{-1}$ ) of the second step of the reaction PCHL->TDCL. |              |                                                     |                                      |                                                |               |                                                      |
| <sup>b</sup> Distance between mutated residues and the 1,2-dichloropropane ligand on the WT structure (pdb: 2bfn).                        |              |                                                     |                                      |                                                |               |                                                      |

**B. diminuta PTE S6 variant (forward trajectory-2NH)**

| A                                    |                   | WT       |                                                            |                                                   |                                               | TRAJECTORY    |                                                       | Epistasis effect                        |            | B                                                          |  |
|--------------------------------------|-------------------|----------|------------------------------------------------------------|---------------------------------------------------|-----------------------------------------------|---------------|-------------------------------------------------------|-----------------------------------------|------------|------------------------------------------------------------|--|
| Round of appearance                  | Variant           | Mutation | Lysate activity relative to PTE <sup>WT</sup> <sup>a</sup> | Fold increase over PTE <sup>WT</sup> <sup>b</sup> | Fold increase over parent enzyme <sup>c</sup> | Ratio Traj/WT | Distance between mut. AA and key residue <sup>e</sup> | Calculation for Trajectory <sup>d</sup> | Variant    | Lysate activity relative to PTE <sup>WT</sup> <sup>a</sup> |  |
| 0                                    | PTE <sup>WT</sup> |          | 1.00                                                       | 1.00                                              | 1.00                                          | -             | -                                                     | -                                       | R18 +V49A  | 56822                                                      |  |
| 1                                    | R1                | H254R    | 10.42                                                      | 3.47                                              | 10.42                                         | 3.0           | 2.6                                                   | R1 / PTE <sup>WT</sup>                  | R8 +I138M  | 47156                                                      |  |
| 2                                    | R2a               | F306L    | 70                                                         | -                                                 | -                                             | -             | -                                                     | -                                       | R8 +T199I  | 1563                                                       |  |
| 2                                    | R2b               | D239E    | 337                                                        | 2.54                                              | 32.31                                         | 12.7          | 3.2                                                   | R2b / R1                                | R14 +I313F | 25024                                                      |  |
| 3                                    | R3                | I274S    | 70                                                         | 1.02                                              | 1.01                                          | 1.0           | 10.3                                                  | R3 / R2a                                | R18 +E77K  | 52038                                                      |  |
| 4                                    | R4                | -        | 564                                                        | -                                                 | -                                             | -             | -                                                     | -                                       | R18 +M140L | 43569                                                      |  |
| 5                                    | R5a               | T172I    | 2137                                                       | 0.15                                              | 4.41                                          | 29.6          | 8.6                                                   | R6 / R5b                                | R18 +F313I | 48012                                                      |  |
| 5                                    | R5b               | S269T    | 642                                                        | 1.03                                              | 1.33                                          | 1.3           | 7.3                                                   | R6 / R5a                                | R20 +A45T  | 32699                                                      |  |
| 6                                    | R6                | -        | 2835                                                       | -                                                 | -                                             | -             | -                                                     | -                                       | R20 +T137S | 59273                                                      |  |
| 7                                    | R7a               | M138I    | 2752                                                       | 1.00                                              | 0.31                                          | 0.3           | 17                                                    | R8 / R8+I138M                           | R20 +V144E | 60205                                                      |  |
| 7                                    | R7b               | -        | 4065                                                       | -                                                 | -                                             | -             | -                                                     | -                                       | R20 +T314M | 49256                                                      |  |
| 7                                    | R7c               | T199I    | 1924                                                       | 0.46                                              | 9.25                                          | 20.0          | 9.2                                                   | R8 / R8+I199I                           | R20 +T341I | 62199                                                      |  |
| 8                                    | R8                | -        | 14462                                                      | -                                                 | -                                             | -             | -                                                     | -                                       | R20*       | 29888                                                      |  |
| 9                                    | R9                | L272M    | 15707                                                      | 0.76                                              | 1.09                                          | 1.4           | 5.8                                                   | R9 / R8                                 | R20+H180Q  | 47132                                                      |  |
| 10                                   | R10               | A80V     | 26569                                                      | 1.10                                              | 1.69                                          | 1.5           | 17                                                    | R10 / R9                                |            |                                                            |  |
| 11                                   | R11a              | S111R    | 24245                                                      | 0.75                                              | 1.30                                          | 1.7           | 17.9                                                  | R12 / R11b                              |            |                                                            |  |
| 11                                   | R11b              | A204G    | 20516                                                      | 0.74                                              | 1.10                                          | 1.5           | 6.5                                                   | R12 / R11a                              |            |                                                            |  |
| 12                                   | R12               | -        | 26594                                                      | -                                                 | -                                             | -             | -                                                     | -                                       |            |                                                            |  |
| 13                                   | R13a              | L271F    | 44983                                                      | 0.66                                              | 2.14                                          | 3.2           | 2.7                                                   | R14 / R13b                              |            |                                                            |  |
| 13                                   | R13b              | L130V    | 24812                                                      | 0.75                                              | 1.18                                          | 1.6           | 9.6                                                   | R14 / R13a                              |            |                                                            |  |
| 14                                   | R14               | -        | 53031                                                      | -                                                 | -                                             | -             | -                                                     | -                                       |            |                                                            |  |
| 18                                   | R18               | A49V     | -                                                          | 0.88                                              | 1.28                                          | 1.5           | 21.1                                                  | R18 / R18+V49a                          |            |                                                            |  |
|                                      |                   | K77E     | 72912                                                      | 0.94                                              | 1.40                                          | 1.5           | 19.8                                                  | R18 / R18+E77K                          |            |                                                            |  |
|                                      |                   | L140M    | -                                                          | 1.73                                              | 1.67                                          | 1.0           | 20.4                                                  | R18 / R18+M140I                         |            |                                                            |  |
|                                      |                   | I313F    | -                                                          | 1.19                                              | 1.52                                          | 1.3           | 7.8                                                   | R18 / R18+F313I                         |            |                                                            |  |
| 19                                   | R19               | S137T    | 35019                                                      | 0.79                                              | 0.86                                          | 1.1           | 19.8                                                  | R20 / R20+T137S                         |            |                                                            |  |
|                                      |                   | Q180H    | -                                                          | 0.58                                              | 0.63                                          | 1.1           | 11.4                                                  | R20* / R20+H180Q                        |            |                                                            |  |
| 20                                   | R20               | T45A     | -                                                          | 0.95                                              | 1.55                                          | 1.6           | 24.9                                                  | R20 / R20+A45I                          |            |                                                            |  |
|                                      |                   | E144V    | 50819                                                      | 0.53                                              | 0.84                                          | 1.6           | 24.7                                                  | R20 / R20+V144e                         |            |                                                            |  |
|                                      |                   | M314T    | -                                                          | 1.14                                              | 1.03                                          | 0.9           | 9.7                                                   | R20 / R20+T314M                         |            |                                                            |  |
|                                      |                   | I341T    | -                                                          | 0.89                                              | 0.82                                          | 0.9           | 25.5                                                  | R20 / R20+T341I                         |            |                                                            |  |
| 21                                   | R21               | S102T    | 43382                                                      | 0.88                                              | 0.85                                          | 1.0           | 7.4                                                   | R21 / R20                               |            |                                                            |  |
| 22                                   | PTE <sup>4E</sup> | V176M    | 40322                                                      | 1.03                                              | 0.93                                          | 0.9           | 15.2                                                  | PTE <sup>4E</sup> / R21                 |            |                                                            |  |
| <b>Obs. fold change final mut/WT</b> |                   |          | 40322                                                      | 0.0521                                            |                                               |               |                                                       |                                         |            |                                                            |  |

<sup>a</sup> The fitness is the catalytic activity in crude lysate relative to PTE<sup>WT</sup>.  
<sup>b</sup> Value obtained experimentally by constructing the single mutation on PTE<sup>WT</sup> background.  
<sup>c</sup> Value calculated from experimental data in Table A and B, with the equations provided in the last column, see note <sup>d</sup>.  
<sup>d</sup> Equations used to calculate the fold increase over the parent enzyme in the previous column, see note <sup>c</sup>.  
<sup>e</sup> Distance between mutated residues on PTE<sup>WT</sup> (PTE-S6; pdb: 4pfp) and the overallid 2-naphthylhexanoate (2NH) analogue ligand from (pdb: 4f3t).



**B. diminuta** PTE AE variant (Reverse trajectory-paraoxon)

| Round of appearance | Variant           | Mutation | WT                                                         |                                                   | TRAJECTORY                                    |               | Epistasis effect                                     |                                                | Calculation for Trajectory <sup>d</sup> |
|---------------------|-------------------|----------|------------------------------------------------------------|---------------------------------------------------|-----------------------------------------------|---------------|------------------------------------------------------|------------------------------------------------|-----------------------------------------|
|                     |                   |          | Lysate activity relative to PTE <sup>AE</sup> <sub>B</sub> | Fold increase over PTE <sup>AE</sup> <sub>B</sub> | Fold increase over parent enzyme <sup>c</sup> | Ratio Traj/WT | Distance between mut AA and key residue <sup>e</sup> |                                                |                                         |
| 0                   | PTE <sup>AE</sup> |          | 1.00                                                       | 1.00                                              | 1.00                                          | -             | -                                                    |                                                |                                         |
| 1                   | revR1             | S308C    | 6.62                                                       | 6.74                                              | 6.60                                          | 4.3           | 0.98                                                 | PTE <sup>AE</sup> +s308C / PTE <sup>AE</sup> * |                                         |
| 1                   | revR2             | I172T    | 10                                                         | -                                                 | -                                             | -             | -                                                    |                                                |                                         |
| 2                   | revR2             | V130M    | 312                                                        | 2.21                                              | 4.06                                          | 8.3           | 1.84                                                 | revR3 / revR3+I172I                            |                                         |
| 2                   | revR3             | F271L    | 905                                                        | 6.92                                              | 5.42                                          | 9.7           | 0.78                                                 | revR3 / revR3+M130V                            |                                         |
| 3                   | revR4             | T314M    | 1357                                                       | 7.23                                              | 2.90                                          | 1.7           | 0.40                                                 | revR3 / revR2                                  |                                         |
| 4                   | revR4             | P135S    | 4572                                                       | 1.52                                              | 3.40                                          | 9.6           | 2.24                                                 | revR4 / revR3+P135S                            |                                         |
| 4                   | revR5             | A203E    | 4572                                                       | 2.61                                              | 1.05                                          | 13.7          | 0.40                                                 | revR4 / revR3+I314M                            |                                         |
| 5                   | revR6             | M293K    | 3660                                                       | 1.30                                              | 2.86                                          | 7             | 2.19                                                 | revR6+K293M / revR4                            |                                         |
| 6                   | revR7a            | G174D    | 9823                                                       | 1.13                                              | 0.94                                          | 24.2          | 0.70                                                 | revR6 / revR6-K293M                            |                                         |
| 7                   | revR7b            | H180Q    | 7170                                                       | 2.85                                              | 2.64                                          | 10.7          | 2.33                                                 | revR9 / revR9+D174G                            |                                         |
| 8                   | revR8a            | -        | 13780                                                      | -                                                 | -                                             | 12            | 1.03                                                 | revR9 / revR9+Q180H                            |                                         |
| 8                   | revR8b            | S258N    | 9361                                                       | 0.93                                              | 2.00                                          | 9.7           | -                                                    | revR9 / revR9-N258S                            |                                         |
| 9                   | revR9             | Y156H    | 18414                                                      | 1.12                                              | 1.28                                          | 23.6          | 1.15                                                 | revR9 / revR9+H156Y                            |                                         |
| 12                  | neoPTE            | I306M    | 19968                                                      | 0.89                                              | 1.14                                          | 4.9           | 1.27                                                 | neoPTE / neoPTE+M306I                          |                                         |
| 12                  | neoPTE            | V49A     | 18653                                                      | 1.21                                              | 1.68                                          | 21.5          | 1.39                                                 | neoPTE* / neoPTE+Q49V                          |                                         |

| Obs. fold change | final mut/WT | Additive model (null) |
|------------------|--------------|-----------------------|
| 19968            | 18653        | 18653                 |

<sup>a</sup> The fitness is the catalytic activity in crude lysate relative to PTE<sup>AE</sup>.  
<sup>b</sup> Value obtained experimentally by constructing the single mutation on PTE<sup>AE</sup> background, extracted from reference <sup>38</sup>.  
<sup>c</sup> Value calculated from experimental data in Table A,B and C with the equations provided in the last column, see note <sup>d</sup>.  
<sup>d</sup> Equations used to calculate the fold increase over the parent enzyme in the previous column, see note <sup>c</sup>.  
<sup>e</sup> Distance between mutated residues on PTE<sup>AE</sup> (PTE-R22, pdb:4pcn) and the overlaid paraoxon analogue (ligand taken from pdb: 2Tn).

**B**

| Variant           | Paraoxon Lysate activity relative to PTE <sup>AE</sup> <sub>A</sub> |
|-------------------|---------------------------------------------------------------------|
| PTE <sup>AE</sup> | 1                                                                   |
| revR3+I172I       | 223                                                                 |
| revR3+M130V       | 167                                                                 |
| revR3+P135S       | 399                                                                 |
| revR3+T314M       | 1291                                                                |
| revR6+K293M       | 3875                                                                |
| revR9+D174G       | 6984                                                                |
| revR9+Q180H       | 6262                                                                |
| revR9+N258S       | 9218                                                                |
| neoPTE+M306I      | 17560                                                               |
| revR9+H156Y       | 14393                                                               |

**C**

| Variant                  | Paraoxon Lysate activity relative to PTE <sup>AE</sup> * or neoPTE <sup>*</sup> <sup>a</sup> |
|--------------------------|----------------------------------------------------------------------------------------------|
| PTE <sup>AE</sup> *      | 1                                                                                            |
| PTE <sup>AE</sup> +s308C | 6.6                                                                                          |
| neoPTE*                  | 1                                                                                            |
| neoPTE+Q49V              | 0.59                                                                                         |

<sup>a</sup> PTE<sup>AE</sup>\* and neoPTE\* were remeasured a posteriori in the same conditions for 449V and s308C normalization only

| <b><i>T. fusca</i> PAMO</b>   |          |                       |                                    |                                                |                            |  |                                                      |
|-------------------------------|----------|-----------------------|------------------------------------|------------------------------------------------|----------------------------|--|------------------------------------------------------|
| Round of appearance           | Mutation | E-Value ( $E_{R/S}$ ) | WT                                 | TRAJECTORY                                     | Epistasis effect           |  | Distance between mut AA and key residue <sup>c</sup> |
|                               |          |                       | Fold increase over Wt <sup>a</sup> | Fold increase over previous round <sup>a</sup> | Ratio Traj/WT <sup>b</sup> |  |                                                      |
| <i>PAMO</i> <sup>WT</sup>     |          | 0.05                  | 1.00                               | 1.00                                           | 1.00                       |  | -                                                    |
| 1                             | A442N    | 0.18                  | 3.51                               | 3.51                                           | 1.00                       |  | 5.3                                                  |
| 2                             | P440F    | 6.98                  | 0.29                               | 38.24                                          | 134.13                     |  | 9.6                                                  |
| 3                             | I67Q     | 19.21                 | 3.51                               | 2.75                                           | 0.78                       |  | 4.6                                                  |
| 4 (ZGZ-2)                     | L443I    | 39.82                 | 0.19                               | 2.07                                           | 10.90                      |  | 7.2                                                  |
| Additive model (null)         |          |                       | 0.67                               |                                                |                            |  |                                                      |
| Obs. fold change final mut/WT |          | 765                   |                                    |                                                |                            |  |                                                      |

<sup>a</sup> The original fitness,  $\Delta\Delta G_{R/S}$  (kcal/mol) was converted to the enantioselectivity factor  $E_{R/S}$  with Equation (1) and (2), see Material and Methods.

<sup>b</sup> The ratio is the enantioselectivity factors provided by each mutation as it occurs in the trajectory ( $E_{TRAJ}$ ) over the effect on the WT background ( $E_{WT}$ ),  $E_{TRAJ}/E_{WT}$ , as described in reference <sup>41</sup>.

<sup>c</sup> Distance between mutated residue and R337 in the WT structure (pdb: 2yfr).

| <b><i>A. niger</i> ANEH</b>   |          |                       |                                      |                                                |                            |  |                                                      |
|-------------------------------|----------|-----------------------|--------------------------------------|------------------------------------------------|----------------------------|--|------------------------------------------------------|
| Round of appearance           | Mutation | E-Value ( $E_{S/R}$ ) | WT                                   | TRAJECTORY                                     | Epistasis effect           |  | Distance between mut AA and key residue <sup>c</sup> |
|                               |          |                       | Fold increase over WT <sup>a,b</sup> | Fold increase over previous round <sup>a</sup> | Ratio Traj/WT <sup>b</sup> |  |                                                      |
| <i>ANEH</i> <sup>WT</sup>     |          | 4.00                  | 1                                    | 1                                              | 1                          |  | -                                                    |
| B                             | L215F    | 16                    | 4.00                                 | 4.00                                           | 1.00                       |  | 3.7                                                  |
|                               | A217N    |                       |                                      |                                                |                            |  | 6                                                    |
|                               | R219S    |                       |                                      |                                                |                            |  | 12.2                                                 |
| C                             | M329P    | 21                    | 1.00                                 | 1.31                                           | 1.31                       |  | 15.8                                                 |
|                               | L330Y    |                       |                                      |                                                |                            |  | 11.9                                                 |
| D                             | C350V    | 24                    | 1.00                                 | 1.14                                           | 1.14                       |  | 4.5                                                  |
| F                             | L249Y    | 32                    | 1.00                                 | 1.33                                           | 1.33                       |  | 5.6                                                  |
| E                             | T317W    | 115                   | 4.00                                 | 3.59                                           | 0.90                       |  | 3.8                                                  |
|                               | T318V    |                       |                                      |                                                |                            |  | 4.7                                                  |
| Additive model (null)         |          |                       | 16                                   |                                                |                            |  |                                                      |
| Obs. fold change final mut/WT |          | 29                    |                                      |                                                |                            |  |                                                      |

<sup>a</sup> The original fitness,  $\Delta\Delta G_{R/S}$  (kcal/mol) was converted to the enantioselectivity factor  $E_{R/S}$  with Equation (1) and (2), see Material and Methods.

<sup>b</sup> The ratio is the enantioselectivity factors provided by each mutation as it occurs in the trajectory ( $E_{TRAJ}$ ) over the effect on the WT background ( $E_{WT}$ ),  $E_{TRAJ}/E_{WT}$ , as described in reference <sup>39</sup>.

<sup>c</sup> Distance between mutated residues and the valpromide inhibitor in the WT structure (pdb: 3g0l).

| <b><i>B. cereus</i> Bc-II</b> |          |                                          |                                      |                                                |                  |  |                                                      |
|-------------------------------|----------|------------------------------------------|--------------------------------------|------------------------------------------------|------------------|--|------------------------------------------------------|
| Round of appearance           | Mutation | MIC ( $\mu\text{g}\cdot\text{ml}^{-1}$ ) | WT                                   | TRAJECTORY                                     | Epistasis effect |  | Distance between mut AA and key residue <sup>b</sup> |
|                               |          |                                          | Fold increase over WT <sup>a,b</sup> | Fold increase over previous round <sup>a</sup> | Ratio Traj/WT    |  |                                                      |
| <i>Bc-II</i> <sup>WT</sup>    |          | 32                                       | 1                                    | 1                                              | 1                |  | -                                                    |
| 1                             | G262S    | 128                                      | 4                                    | 4.0                                            | 1.0              |  | 5.1                                                  |
| 2                             | L250S    | 256                                      | 1                                    | 2.0                                            | 2.0              |  | 19.3                                                 |
| 3                             | N70S     | 512                                      | 0.5                                  | 2.0                                            | 4.0              |  | 7.4                                                  |
| 4 (GLNV)                      | V112A    | 1024                                     | 2                                    | 2.0                                            | 1.0              |  | 14.4                                                 |
| Additive model (null)         |          |                                          | 4                                    |                                                |                  |  |                                                      |
| Obs. fold change final mut/WT |          | 32                                       |                                      |                                                |                  |  |                                                      |

<sup>a</sup> The fitness is the MIC ( $\mu\text{g}\cdot\text{ml}^{-1}$ ).

<sup>b</sup> Distance between mutated residues and Zn<sup>2+</sup> (II) on the WT structure (pdb: 1bc2).

| <b><i>E. coli</i> TEM-1</b>   |          |                                          |                                      |                                                |                  |  |                                                      |
|-------------------------------|----------|------------------------------------------|--------------------------------------|------------------------------------------------|------------------|--|------------------------------------------------------|
| Round of appearance           | Mutation | MIC ( $\mu\text{g}\cdot\text{ml}^{-1}$ ) | WT                                   | TRAJECTORY                                     | Epistasis effect |  | Distance between mut AA and key residue <sup>b</sup> |
|                               |          |                                          | Fold increase over WT <sup>a,b</sup> | Fold increase over previous round <sup>a</sup> | Ratio Traj/WT    |  |                                                      |
| <i>TEM-1</i> <sup>WT</sup>    |          | 0.088                                    | 1                                    | 1                                              | 1                |  | -                                                    |
| 1                             | G238S    | 1.4                                      | 15.91                                | 15.91                                          | 1.00             |  | 3.6                                                  |
| 2                             | E104K    | 360                                      | 1.48                                 | 257.14                                         | 174.07           |  | 4.1                                                  |
| 3                             | A42G     | 2100                                     | 1.00                                 | 5.83                                           | 5.83             |  | 15                                                   |
| 4                             | M182T    | 2900                                     | 0.72                                 | 1.38                                           | 1.93             |  | 15.4                                                 |
| 5                             | g4205a   | 4100                                     | 1.00                                 | 1.41                                           | 1.41             |  | -                                                    |
| Additive model (null)         |          |                                          | 17                                   |                                                |                  |  |                                                      |
| Obs. fold change final mut/WT |          | 46591                                    |                                      |                                                |                  |  |                                                      |

<sup>a</sup> The fitness is the MIC ( $\mu\text{g}/\text{mL}$ ).

<sup>b</sup> Distance between mutated residues on the WT structure (pdb: 1bt1) and the overlaid N-(benzyloxycarbonyl)amino[methyl]phosphate, a transition state analogue from (pdb: 1axb).

**Table S2.** Summary of round-per-round improvements for nine evolutionary trajectories.

**AtzA**

|                           |                | Fold increase normalized on n-1 mutations |         |         |         |         |         |         |         |         |  |
|---------------------------|----------------|-------------------------------------------|---------|---------|---------|---------|---------|---------|---------|---------|--|
| Round of evolution        | Mutation fixed | Round 1                                   | Round 2 | Round 3 | Round 4 | Round 5 | Round 6 | Round 7 | Round 8 | Round 9 |  |
| <i>AtzA</i> <sup>WT</sup> |                | n.d.                                      |         |         |         |         |         |         |         |         |  |
| 1                         | S331C          | 50.00                                     | 1.00    |         |         |         |         |         |         |         |  |
| 2                         | F84L           | n.d.                                      | 18.20   | 1.00    |         |         |         |         |         |         |  |
| 3                         | N328D          | n.d.                                      | 7.60    | 6.70    | 1.00    |         |         |         |         |         |  |
| 4                         | E125D          | n.d.                                      | 1.66    | 0.30    | 1.79    | 1.00    |         |         |         |         |  |
| 5                         | T219P          | n.d.                                      | 1.00    | 0.20    | 0.91    | 1.72    | 1.00    |         |         |         |  |
| 6                         | T217I          | n.d.                                      | 1.20    | 0.32    | 0.44    | 1.42    | 0.99    | 1.00    |         |         |  |
| 7                         | V92L           | n.d.                                      | 1.00    | 0.31    | 1.59    | 1.20    | 0.75    | 1.06    | 1.00    |         |  |
| 8                         | G255W          | n.d.                                      | 1.77    | 0.20    | 0.60    | 1.68    | 0.85    | 0.74    | 1.05    | 1.00    |  |
| <i>TriA</i> <sup>WT</sup> | I253L          | n.d.                                      | 1.08    | 0.22    | 0.43    | 1.49    | 0.55    | 0.81    | 0.74    | 1.00    |  |

***P. vivax* DHFR**

|                           |                | Fold increase normalized on n-1 mutations |         |         |         |
|---------------------------|----------------|-------------------------------------------|---------|---------|---------|
| Round of evolution        | Mutation fixed | Round 1                                   | Round 2 | Round 3 | Round 4 |
| <i>DHFR</i> <sup>WT</sup> |                | 1.00                                      |         |         |         |
| 1                         | S117N          | 570.50                                    | 1.00    |         |         |
| 2                         | S58R           | 17.79                                     | 1.07    | 1.00    |         |
| 3                         | N50I           | 87.41                                     | 1.91    | 2.50    | 1.00    |
| 4                         | I173L          | 2.90                                      | 1.66    | 2.18    | 1.54    |

***T. fusca* PAMO**

|                           |                | Fold increase normalized on n-1 mutations |         |         |         |
|---------------------------|----------------|-------------------------------------------|---------|---------|---------|
| Round of evolution        | Mutation fixed | Round 1                                   | Round 2 | Round 3 | Round 4 |
| <i>PAMO</i> <sup>WT</sup> |                | 1.00                                      |         |         |         |
| 1                         | A442N          | 3.51                                      | 1.00    |         |         |
| 2                         | P440F          | 0.29                                      | 38.24   | 1.00    |         |
| 3                         | I67Q           | 3.51                                      | 3.37    | 2.75    | 1.00    |
| 4 (ZGZ-2)                 | L443I          | 0.19                                      | 1.63    | 0.85    | 2.07    |

***A. niger* ANEH**

|                           |                | Fold increase normalized on n-1 mutations |         |         |         |         |
|---------------------------|----------------|-------------------------------------------|---------|---------|---------|---------|
| Round of evolution        | Mutation fixed | Round 1                                   | Round 2 | Round 3 | Round 4 | Round 5 |
| <i>ANEH</i> <sup>WT</sup> |                | 1.00                                      |         |         |         |         |
| 1                         | B              | 4.00                                      | 1.00    |         |         |         |
| 2                         | C              | 1.00                                      | 1.31    | 1.00    |         |         |
| 3                         | D              | 1.00                                      | 1.00    | 1.14    | 1.00    |         |
| 4                         | F              | 1.00                                      | 1.50    | 1.24    | 1.33    | 1.00    |
| 5 (BCDFE)                 | E              | 4.00                                      | 2.38    | 1.67    | 2.92    | 3.59    |

***B. cereus* Bc-II**

|                            |                | Fold increase normalized on n-1 mutations |         |         |         |
|----------------------------|----------------|-------------------------------------------|---------|---------|---------|
| Round of evolution         | Mutation fixed | Round 1                                   | Round 2 | Round 3 | Round 4 |
| <i>Bc-II</i> <sup>WT</sup> |                | 1.00                                      |         |         |         |
| 1                          | G              | 4.00                                      | 1.00    |         |         |
| 2                          | L              | 1.00                                      | 64.00   | 1.00    |         |
| 3                          | N              | 0.50                                      | 64.00   | 2.00    | 1.00    |
| 4 (GLNV)                   | V              | 2.00                                      | 64.00   | 2.00    | 2.00    |

***E. coli* TEM-1**

|                            |                | Fold increase normalized on n-1 mutations |         |         |         |         |
|----------------------------|----------------|-------------------------------------------|---------|---------|---------|---------|
| Round of evolution         | Mutation fixed | Round 1                                   | Round 2 | Round 3 | Round 4 | Round 5 |
| <i>TEM-1</i> <sup>WT</sup> |                | 1.00                                      |         |         |         |         |
| 1                          | G238S          | 15.91                                     | 1.00    |         |         |         |
| 2                          | E104K          | 1.48                                      | 257.14  | 1.00    |         |         |
| 3                          | A42G           | 1.00                                      | 16.43   | 5.83    | 1.00    |         |
| 4                          | M182T          | 0.72                                      | 22.86   | 1.00    | 1.38    | 1.00    |
| 5                          | g4205a         | 1.00                                      | 1.00    | 1.00    | 0.71    | 1.41    |

## REFERENCES

1. Zhang ZG, Lonsdale R, Sanchis J, Reetz MT. Extreme synergistic mutational effects in the directed evolution of a baeyer-villiger monooxygenase as catalyst for asymmetric sulfoxidation. *J Am Chem Soc* 2014;136(49):17262-72.
